# Supplementary material for: DNA Methylation in the Exon 1 Region and Complex Regulation of Twist1 Expression in Gastric Cancer Cells
Source: PLoS One. 2015 Dec 22;10(12):e0145630. doi: 10.1371/journal.pone.0145630 (PMC4687923; doi:10.1371/journal.pone.0145630)
Supplement: S1 Table — (XLSX) [file pone.0145630.s007.xlsx]

## Sheet: RT-PCR
	Supplementary Table 1.
	Primer sequences for PCR used in this study.
	Type of PCR1)	Species	Genes	Sense	Antisense	Sizes of PCR products (bp)	Tm (°C)
	RT-PCR	Mouse	Twist1	GGACAAGCTGAGCAAGATTCA	﻿TTCTCCTTCTCTGGAAACAATG	256	58
			Suv39h1	CCGTGAGCAGGAGTATTACCT	﻿GTGTCGTCGGACAAGCTCTC	142	60
			Suv39h2	TCACAGTGGATGCAGCTCGATATG	﻿GCTCCACATTTACATTGGGTTCTGA	262	58
			G9a	GCTCTACCGGACTGCCAAGATG	GATGTTGGGGTCACACAGGTGGT	235	58
			Setdb1	CAAGTCAACCCTAACTCTGGCTAC	GTCTGCAAAGTCATCTGTCAGGAT	258	58
			Mll1	GCATTACTGAGAGGAAGCCCAAG	AGAAACACAACGGCATCATGGAGA	214	58
			Mll2	GAGCCACCTGTGATGAAGAAGAG	AGTCAGCACAGAGCGAATGACAA	233	58
			Mll3	GAAACCTGAGGGCACTTTATCTTC	GCTGTTTCAAGTGGGTGAAGGAGT	299	58
			Mll4	CTATGAGGCCACGCGCATCTAC	GAGTTCTTCGCCTTTCAGGTACTC	253	58
			Setd1a	GATGAGAAGCCTGAGACAGACGG	TGTGGAAGGTTCTGGGACTGGTG	276	58
			Ash1l	CTCTCCATCCCGTCGGTTCTATC	CTTTTGGGAGTGAGCTTCTTGGG	279	58
			Ezh2	TGCCTCCTGAATGTACTCCAA	AGGGATGTAGGAAGCAGTCATAC	129	60
			Sp1	GATACATGATGAGACAGCAGGTGG	GACCAATTACACATGAATGGCCTC	258	58
			Sp3	TTCGGAGGGTAGCTTGCACCTG	TCTGGACAAACAAACTTCTTCTCAC	271	58
			Gapdh	TGAAGCAGGCATCTGAGGG	CGAAGGTGGAAGAGTGGGAG	102	62
		Human	TWIST1	GGACAAGCTGAGCAAGATTCA	﻿TTCTCCTTCTCTGGAAACAATG	256	58
			SP1	AAGCAGCACCATTGTCAGGGCA	CATGGAGACCAAGCTGAGCTCC	461	60
			SP3	CCATGGTGTGCAAGCCAGTGGT	AATCACCACTGAGCTGCCACTC	436	60
			GAPDH	GACCACAGTCCATGCCATCAC	GTCCACCACCCTGTTGCTGTA	454	62
	qRT-PCR	Mouse	Twist1	GGACAAGCTGAGCAAGATTCA	﻿CGGAGAAGGCGTAGCTGAG	146	62
			Suv39h1	CCGTGAGCAGGAGTATTACCT	﻿GTGTCGTCGGACAAGCTCTC	142	60
			Suv39h2	ACGCTGGAGAAGAGCTGACTTTTG	﻿GCTCCACATTTACATTGGGTTCTGA	118	60
	Genomic PCR	Mouse	Cdh1-loxP	CTTATACCGCTCGAGAGCCGGA	GTGTCCCTCCAAATCCGATA	980	60
			Truncated Cdh1	GAATTCTGAACATCATTATCAGTATTTA	TGACACATGCCTTTACTTTAGT	326	60
			Trp53-loxP	AAGGGGTATGAGGGACAAGG	GAAGACAGAAAAGGGGAGGG	584	58
			Truncated Trp53	CACAAAAACAGGTTAAACCCAG	GAAGTGATGGGAGCTAGCAG	602	58
			Atp4b-Cre	CAGCGGAGGGCAGATAGCAAGCAAG	CCGGTTATTCAACTTGCACC	411	58
	1) The cycle numbers for standard PCR were 35. qRT-PCR was comprised 45 cycles with a Light Cycler system.
